# Supplementary material
Source: PubMed Central journal article supplement (PMC7539685)
Supplement: NIHMS1614830-supplement-Appendix.pdf [file NIHMS1614830-supplement-Appendix.pdf]

## **Appendix A. Methodological details**

We evaluated whether hospitals' advertising spending was associated with long-term survival among cancer patients treated in those centers. For both measures, we applied previously described methods.<sup>1,2</sup> We captured hospital advertising spending for cancer services in 2014 using data from the media-monitoring agency Kantar Media (New York, New York). We included advertising by centers with the terms "cancer," "oncology," "radiation," or another cancer therapy (e.g., proton therapy) in their name or advertisement.<sup>2</sup> Free-standing clinics and solo outpatient centers were excluded.

Medicare Fee-for-Service (FFS) 100% Research Identifiable Files were used to determine hospital risk-adjusted five-year mortality ratios, including cases from 2011-12. Each case had new claims for cancer care after a year (or more) without a claim for a cancer diagnosis, and mortality data through 2017.<sup>1</sup> When multiple hospitals were involved under one advertising campaign, we pooled their outcomes weighted by the number of patients treated at each hospital. We included the top 50 hospitals (or sets of hospitals) in terms of their advertising spending, accounting for over 89% of the 173 million dollars spent on advertising in 2014.

### *Statistical analysis*

The primary test of association was a linear regression, with advertising spending as the predictor. The outcome was a risk-adjusted mortality ratio which was determined by dividing the observed number of deaths by an expected number. In brief, the 3M Clinical Risk Group (CRG) risk adjustment model in combination with adjustments for age and median income level of the zip code of residence serve to adjust for differences in patient severity and population demographics. A risk-adjusted mortality ratio below one indicates that a hospital performed better than expected, where a ratio greater than one means a hospital had higher mortality than what was expected. The R-squared from the regression model was used to see how well advertising spending explained outcomes. We conducted additional analyses that included a log transformation of the x variable (i.e., spending) and weighting of the outcome (y) variable (i.e.,

risk-adjusted five-year mortality) by the volume of patients at the hospital. In total, there were four models used to assess the relationship between advertising spending and risk-adjusted mortality. This study was deemed exempt research by the institutional review board of Memorial Sloan Kettering Cancer Center. The Centers for Medicare & Medicaid Services and Kantar Media granted data use approvals.

#### References:

1. Pfister DG, Rubin DM, Elkin EB, et al. Risk Adjusting Survival Outcomes in Hospitals That Treat Patients With Cancer Without Information on Cancer Stage. *JAMA oncology* 2015; **1**(9): 1303-10.
2. Vater LB, Donohue JM, Park SY, Schenker Y. Trends in Cancer-Center Spending on Advertising in the United States, 2005 to 2014. *JAMA Intern Med* 2016; **176**(8): 1214-6.

**Appendix B. Advertising spend and risk-adjusted five-year mortality for top 50 hospital advertisers**

| Rank by advertising spend | Hospital advertiser <sup>1</sup>                           | State(s) <sup>2</sup> | Advertising spend (\$) in thousands <sup>3</sup> | Total number of FFS Medicare patients <sup>4</sup> | Five-year risk-standardized mortality ratio <sup>5</sup> |
|---------------------------|------------------------------------------------------------|-----------------------|--------------------------------------------------|----------------------------------------------------|----------------------------------------------------------|
| 1                         | Cancer Treatment Centers of America                        | AZ, GA, IL, OK, PA    | 101741                                           | 506                                                | 1.13                                                     |
| 2                         | MD Anderson Cancer Center                                  | AZ, NJ, TX            | 15155                                            | 7587                                               | 0.90                                                     |
| 3                         | Memorial Sloan Kettering Cancer Center                     | NY                    | 9086                                             | 5945                                               | 0.83                                                     |
| 4                         | Fox Chase Cancer Center                                    | PA                    | 3520                                             | 1233                                               | 0.90                                                     |
| 5                         | Huntsman Cancer Institute                                  | UT                    | 2178                                             | 901                                                | 1.03                                                     |
| 6                         | Sutter Cancer Center                                       | CA                    | 2089                                             | 2026                                               | 0.97                                                     |
| 7                         | Dana-Farber Cancer Institute                               | MA                    | 1836                                             | 2993                                               | 0.94                                                     |
| 8                         | Seattle Cancer Care Alliance                               | WA                    | 1821                                             | 1591                                               | 0.97                                                     |
| 9                         | Winthrop NYCyberKnife Center                               | NY                    | 1336                                             | 1162                                               | 0.98                                                     |
| 10                        | CDH Proton Center                                          | IL                    | 1256                                             | 1910                                               | 0.89                                                     |
| 11                        | H Lee Moffitt Cancer Center                                | FL                    | 1113                                             | 2794                                               | 0.87                                                     |
| 12                        | University of Florida                                      | FL                    | 1113                                             | 1839                                               | 0.94                                                     |
| 13                        | James Cancer Hospital                                      | OH                    | 962                                              | 1646                                               | 0.96                                                     |
| 14                        | Edward Cancer Center                                       | IL                    | 864                                              | 720                                                | 1.01                                                     |
| 15                        | Swedish Cancer Institute                                   | WA                    | 663                                              | 1818                                               | 0.96                                                     |
| 16                        | Smilow Cancer Hospital                                     | CT                    | 573                                              | 2235                                               | 0.97                                                     |
| 17                        | Siteman Cancer Center                                      | MO                    | 486                                              | 2844                                               | 0.97                                                     |
| 18                        | University of MD Greenebaum Cancer Center                  | MD                    | 396                                              | 817                                                | 1.02                                                     |
| 19                        | Karmanos Cancer Institute                                  | MI                    | 386                                              | 971                                                | 0.96                                                     |
| 20                        | Scripps Proton Therapy Center                              | CA                    | 363                                              | 1965                                               | 0.97                                                     |
| 21                        | Northside Hospital Cancer Institute                        | GA                    | 340                                              | 1712                                               | 1.03                                                     |
| 22                        | Cancer Institute of NJ                                     | NJ                    | 338                                              | 171                                                | 1.01                                                     |
| 23                        | Morristown Medical Center                                  | NJ                    | 332                                              | 1325                                               | 0.98                                                     |
| 24                        | Houston Methodist Cancer Center                            | TX                    | 322                                              | 93                                                 | 1.04                                                     |
| 25                        | NYU Cancer Institute                                       | NY                    | 306                                              | 1630                                               | 0.87                                                     |
| 26                        | HealthEast CyberKnife Center                               | MN                    | 305                                              | 151                                                | 1.07                                                     |
| 27                        | University of Chicago Medicine Comprehensive Cancer Center | IL                    | 303                                              | 1351                                               | 0.93                                                     |
| 28                        | Hartford HealthCare Cancer Institute                       | CT                    | 266                                              | 2514                                               | 0.99                                                     |
| 29                        | Abramson Cancer Center                                     | PA                    | 264                                              | 3047                                               | 0.92                                                     |
| 30                        | Memorial Cancer Institute                                  | FL                    | 255                                              | 433                                                | 0.97                                                     |
| 31                        | City of Hope Cancer Center                                 | CA                    | 241                                              | 1178                                               | 0.87                                                     |
| 32                        | University of KS Cancer Center                             | KS                    | 224                                              | 1851                                               | 1.01                                                     |
| 33                        | Christus Schumpert Cancer Treatment Center                 | LA                    | 218                                              | 559                                                | 1.02                                                     |
| 34                        | Sylvester Comprehensive Cancer Center                      | FL                    | 197                                              | 659                                                | 0.93                                                     |
| 35                        | University Hospitals Seidman Cancer Center                 | OH                    | 194                                              | 1414                                               | 0.93                                                     |
| 36                        | UPMC Cancer Centers                                        | PA                    | 184                                              | 3949                                               | 0.97                                                     |
| 37                        | Edwards Comprehensive Cancer Center                        | WV                    | 172                                              | 389                                                | 0.98                                                     |
| 38                        | Mary Bird Perkins Cancer Center                            | LA                    | 171                                              | 1454                                               | 1.04                                                     |
| 39                        | John Theurer Cancer Center                                 | NJ                    | 165                                              | 1870                                               | 0.93                                                     |
| 40                        | Kettering Cancer Care                                      | OH                    | 164                                              | 709                                                | 0.96                                                     |
| 41                        | Intermountain Cancer Center                                | UT                    | 156                                              | 679                                                | 1.03                                                     |
| 42                        | St Peters Hospital Cancer Care Center                      | NY                    | 150                                              | 957                                                | 0.97                                                     |
| 43                        | Stephenson Cancer Center OU Medical                        | OK                    | 146                                              | 900                                                | 0.99                                                     |
| 44                        | USC Norris Comprehensive Cancer Center                     | CA                    | 135                                              | 263                                                | 1.00                                                     |
| 45                        | Upstate Cancer Center                                      | NY                    | 133                                              | 767                                                | 1.04                                                     |
| 46                        | Integris Cancer Institute of OK                            | OK                    | 132                                              | 1210                                               | 1.01                                                     |

|    |                                                 |            |     |      |      |
|----|-------------------------------------------------|------------|-----|------|------|
| 47 | Providence Cancer Center                        | AK, OR, WA | 127 | 5486 | 0.98 |
| 48 | Reid Cancer Center                              | IN         | 124 | 531  | 1.07 |
| 49 | Montefiore Einstein Center for Cancer Care      | NY         | 120 | 951  | 1.00 |
| 50 | Inova Comprehensive Cancer & Research Institute | VA         | 106 | 2580 | 1.01 |

<sup>1</sup>Advertisers include hospitals or set of hospitals involved under one advertising campaign.

<sup>2</sup>These are the states for the hospitals that were used to calculate the five-year risk-adjusted mortality ratio for that advertiser.

<sup>3</sup>Advertising spend for 2014.

<sup>4</sup>Volume is summed over the set of hospitals involved under one advertising campaign.

<sup>5</sup>Hospital risk-adjusted mortality ratio for patients with FFS Medicare coverage beginning treatment in 2011-2012.
